# Supplementary material for: Speiseplan für Hochbetagte
Source: Springer Nature journal article supplement (doi:10.1007/s00058-022-2932-8), 2022-10-01
Supplement: MOESM1 [file 23561286]

# Literatur

## zum PflegeKolleg „Ernährung im Alter“ von Brigitte Pleyer und Alexandra Raidl

*Heilberufe (74) 10/2022, S. 12-23*

### **1. Beitrag „Plaudern und kochen – das geht nicht mehr gleichzeitig“**

Biedermann M (2011) Essen als basale Stimulation. Vincentz Network, Hannover

Flamme I (o.J.) Frontotemporale Demenz.

<http://www.demenzinfo.at/de/frontotemporale-demenz>. Zugriffen: 2. April 2017

Gatterer G, Croy A (2006) Geistig fit ins Alter 1–3. Springer, Wien

Köther I (2011) Für eine sichere und fördernde Umgebung sorgen können. In: Köther I Altenpflege. Thieme, Stuttgart, S 370-380

Menebröcker C (2008) Ernährung in der Altenpflege, Elsevier GmbH, München

Rettenwender E (2016) Psychologie. Veritas, Linz

### **2. Beitrag „Speiseplan für Hochbetagte“**

Gerhard C (2015) Praxiswissen Palliativmedizin. Thieme, Stuttgart

Volkert D (2015) Ernährung im Alter. Praxiswissen Gerontologie und Geriatrie kompakt, Band 4. De Gruyter, Berlin

Weissenberger-Leduc M, Frühwald T (2013) Zu Fragen der Ernährung am Lebensende – unter besonderer Berücksichtigung ethischer Aspekte. Akt Ernährungsmed 38:353-361

### **3. Beitrag „Trinken – Kauen – Schlucken“**

Biedermann M (2011) Essen als basale Stimulation. Vincentz Network, Hannover
